# Supplementary material for: DULoc: quantitatively unmixing protein subcellular location patterns in immunofluorescence images based on deep learning features
Source: Oxford University Press journal article supplement (doi:10.1093/bioinformatics/btab730), 2021-10-20
Supplement: btab730_supplementary_data.pdf [file btab730_supplementary_data.pdf]

## Supplementary Data

For article:

DULoc: quantitatively unmixing protein subcellular location patterns in immunofluorescence images based on deep learning features

Min-Qi Xue<sup>1,2</sup>, Xi-Liang Zhu<sup>1,2</sup>, Ge Wang<sup>1,2</sup>, and Ying-Ying Xu<sup>1,2,\*</sup>

<sup>1</sup>School of Biomedical Engineering and Guangdong Provincial Key Laboratory of Medical Image Processing, Southern Medical University, Guangzhou 510515, China, <sup>2</sup>Guangdong Province Engineering Laboratory for Medical Imaging and Diagnostic Technology, Southern Medical University, Guangzhou 510515, China

\*To whom correspondence should be addressed. [yyxu@smu.edu.cn](mailto:yyxu@smu.edu.cn)

### Contents

| Content                | Description                                                                                             | Page |
|------------------------|---------------------------------------------------------------------------------------------------------|------|
| Supplementary Figure 1 | Regression results of the images with different fraction patterns in the real dataset                   | 2    |
| Supplementary Figure 2 | Comparison of synthetic and real cell images of different combinations                                  | 3    |
| Supplementary Figure 3 | MSE results of different pattern unmixing methods                                                       | 4    |
| Supplementary Figure 4 | Performance on different fraction patterns when using the pattern unmixing methods                      | 5    |
| Supplementary Table 1  | Statistics of misclassifying multi-label proteins as single-locational                                  | 6    |
| Supplementary Table 2  | Averaged computing time required to decompose an image                                                  | 7    |
| Supplementary Table 3  | Comparison of features from the penultimate and last layers used in DULoc model for unmixing HPA images | 8    |

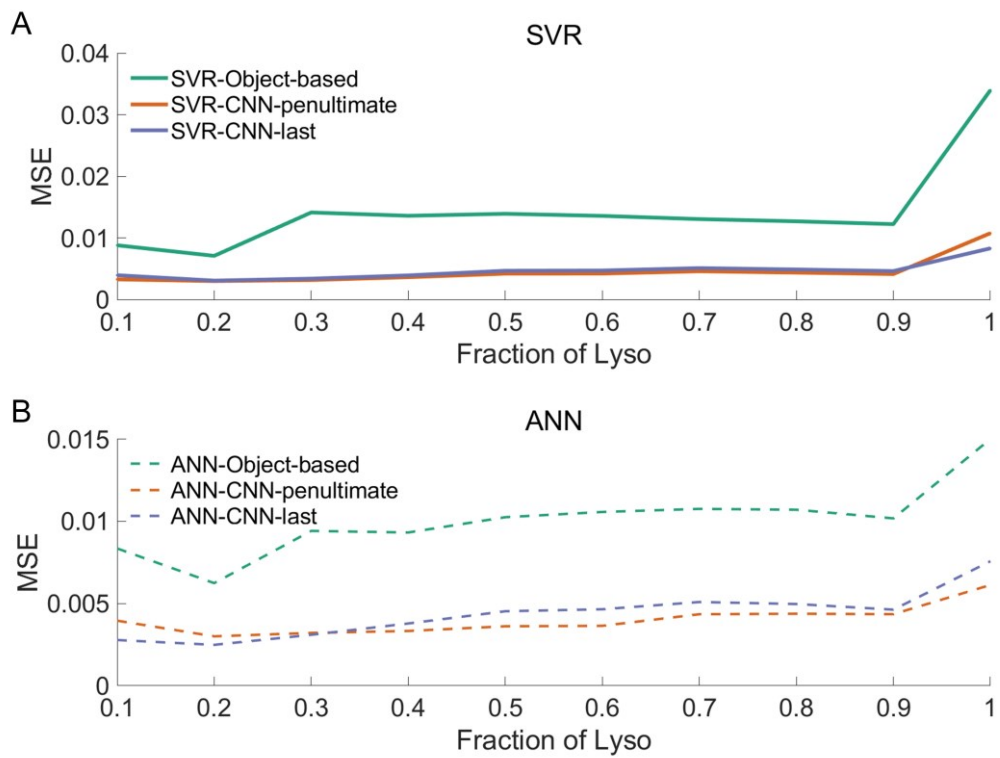

**Supplementary Figure 1.** Regression results of the images with different fraction patterns in the real dataset. (A) Results of SVR. (B) Results of ANN.

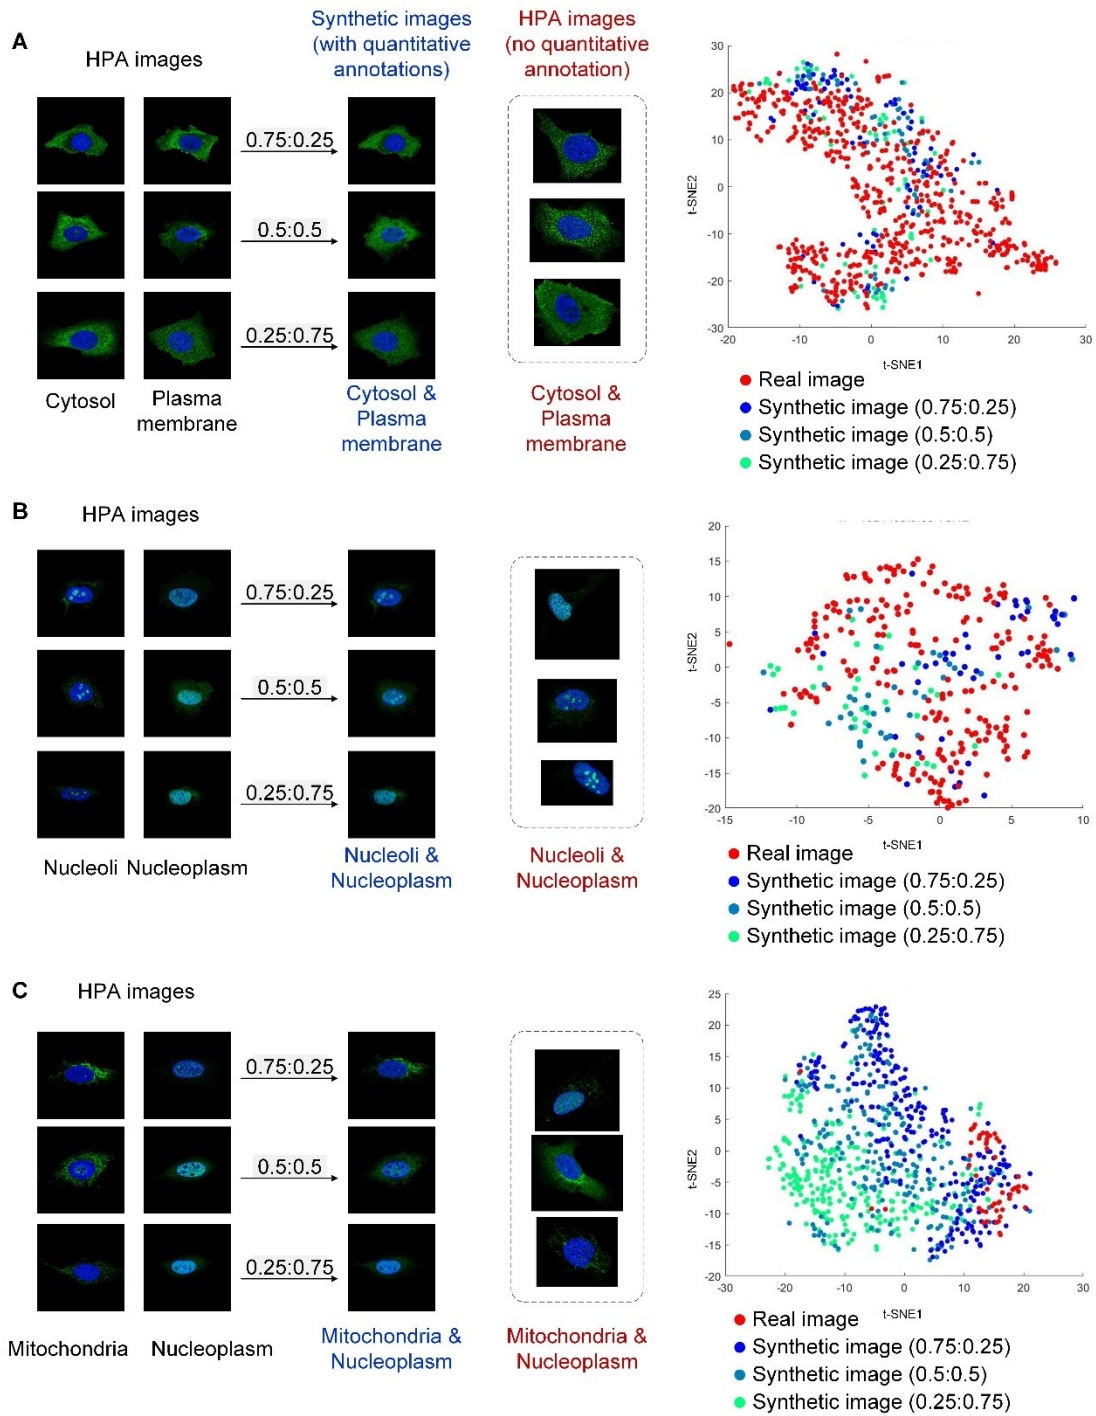

**Supplementary Figure 2.** Comparison of synthetic and real cell images of different combinations. Example images and t-SNE visualization of combination (A) cytosol and plasma membrane, (B) nucleoli and nucleoplasm, and (C) mitochondria and nucleoplasm are shown.

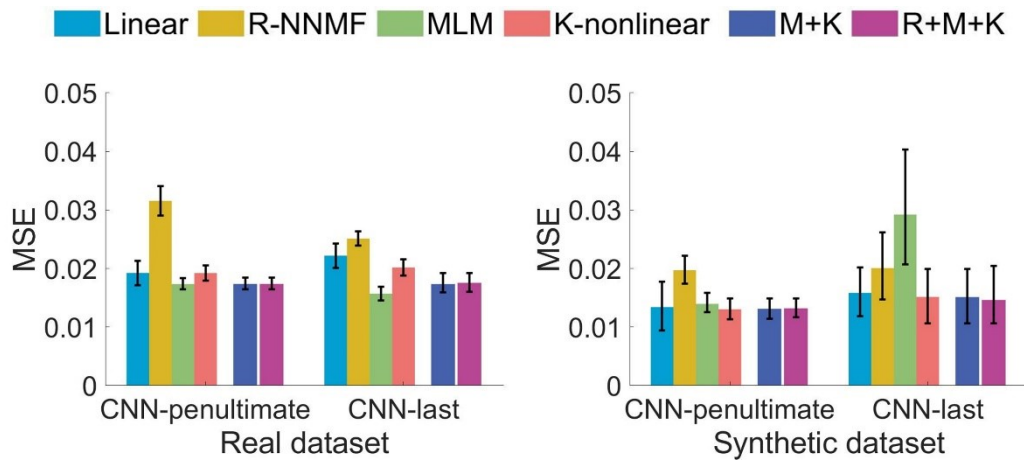

**Supplementary Figure 3.** MSE results of different pattern unmixing methods

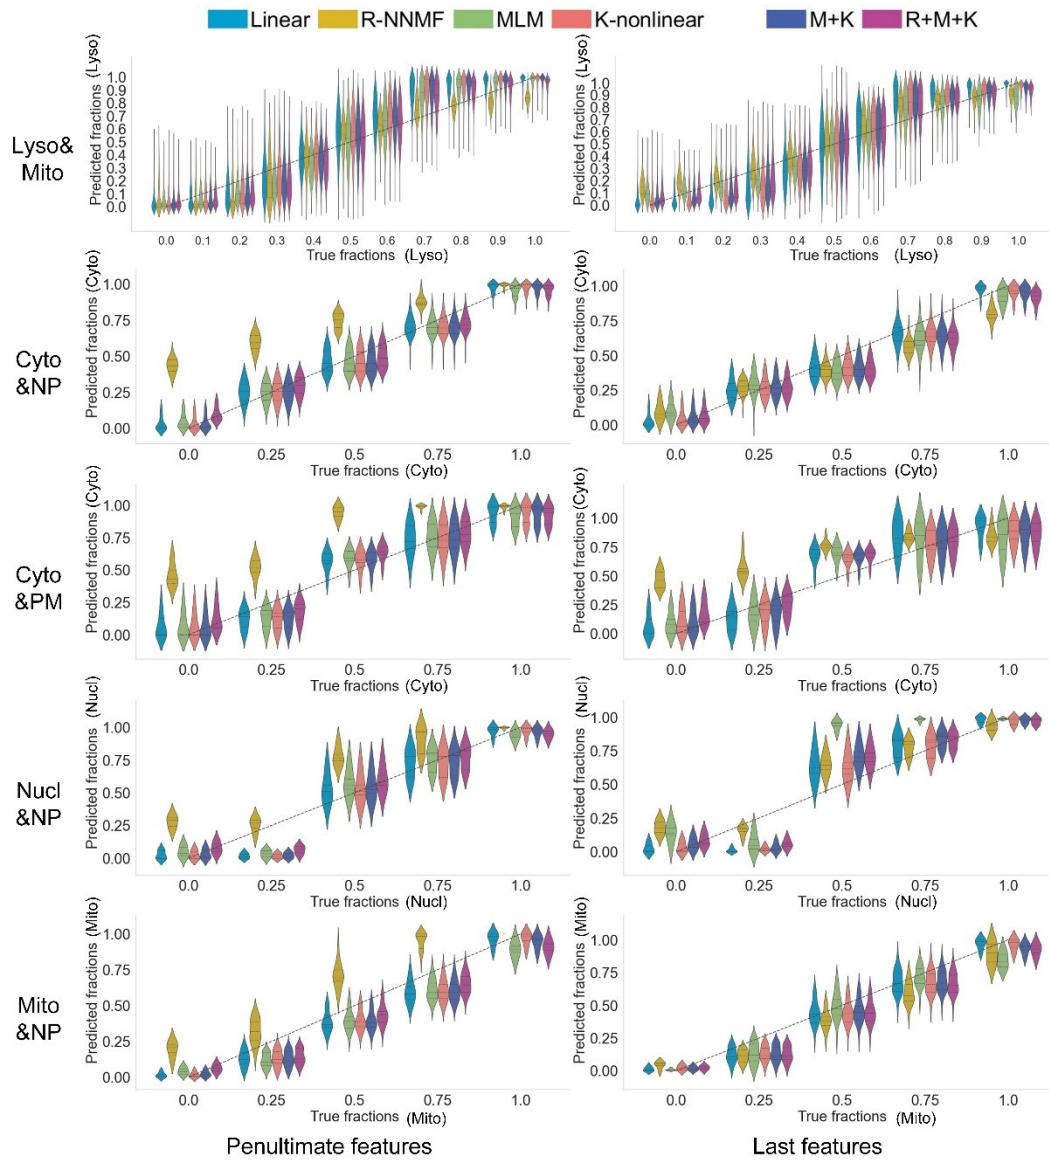

**Supplementary Figure 4.** Performance on different fraction patterns when using the pattern unmixing methods. For the synthetic dataset, the unmixing methods showed poor performance on the patterns “Cytosol & Plasma membrane” and “Nucleoli & Nucleoplasm”, because the location pairs in the two combinations are too similar, and difficult to decompose.

**Supplementary Table 1.** Statistics of misclassifying multi-label proteins as single-locational. The statistics was based on the 1816 multi-label images in the real dataset.

| Methods     | Penultimate layer features      |                            | Last layer features             |                            |
|-------------|---------------------------------|----------------------------|---------------------------------|----------------------------|
|             | number of misclassified samples | Ratio of misclassification | number of misclassified samples | Ratio of misclassification |
| Linear      | 200                             | 11.01%                     | 287                             | 15.8%                      |
| R-NNMF      | 0                               | 0%                         | 3                               | 0.17%                      |
| MLM         | 36                              | 1.98%                      | 2                               | 0.11%                      |
| K-nonlinear | 1                               | 0.06%                      | 2                               | 0.11%                      |
| M+K         | 0                               | 0%                         | 0                               | 0%                         |
| R+M+K       | 0                               | 0%                         | 0                               | 0%                         |

**Supplementary Table 2.** Averaged computing time required to decompose an image

| Output layer of the bestfitting | Number of features | Linear  | R-NNMF  | MLM     | K-nonlinear |
|---------------------------------|--------------------|---------|---------|---------|-------------|
| Penultimate                     | 1024               | 0.0010s | 3.2305s | 0.0589s | 0.0771s     |
| Last                            | 28                 | 0.0011s | 0.0307s | 0.0195s | 0.000064s   |

**Supplementary Table 3.** Comparison of the features from the penultimate and last layers used in DULoc model for unmixing HPA images

| Cell line | Number of labels | Ratio of correct predictions (DULoc using the penultimate layer features) | Ratio of correct predictions (DULoc using the last layer features) |
|-----------|------------------|---------------------------------------------------------------------------|--------------------------------------------------------------------|
| U-2 OS    | Double           | 79.43%                                                                    | 81.96%                                                             |
|           | Triple           | 56.83%                                                                    | 52.40%                                                             |
|           | Quadruple        | 31.25%                                                                    | 37.50%                                                             |
| A-431     | Double           | 77.49%                                                                    | 81.32%                                                             |
|           | Triple           | 55.07%                                                                    | 58.15%                                                             |
|           | Quadruple        | 28.00%                                                                    | 28.00%                                                             |
| U-251 MG  | Double           | 72.00%                                                                    | 72.73%                                                             |
|           | Triple           | 54.25%                                                                    | 52.94%                                                             |
|           | Quadruple        | 42.86%                                                                    | 42.86%                                                             |
| In total  |                  | 69.05%                                                                    | 70.52%                                                             |
